# Supplementary material
Source: PubMed Central journal article supplement (PMC2727558)
Supplement: supp_136_6_923__1.pdf [file supp_136_6_923__1.pdf]

**Table S1. *smg* mutant embryos fail to end cleavage stage**

|            | M10                              | I11                              | M11                              | I12                              | M12                              | I13                               | M13                              | I14/Cell                         |
|------------|----------------------------------|----------------------------------|----------------------------------|----------------------------------|----------------------------------|-----------------------------------|----------------------------------|----------------------------------|
| Wild type  | <b>4.4</b> (1.1)<br><i>n</i> =6  | <b>6.9</b> (1.0)<br><i>n</i> =8  | <b>3.9</b> (1.6)<br><i>n</i> =8  | <b>8.4</b> (1.8)<br><i>n</i> =8  | <b>4.6</b> (1.6)<br><i>n</i> =8  | <b>14.1</b> (2.4)<br><i>n</i> =8  | <b>6.3</b> (1.7)<br><i>n</i> =8  | <b>53</b> (5.6)<br><i>n</i> =8   |
| <i>smg</i> | <b>6.0</b> (3.8)<br><i>n</i> =12 | <b>6.5</b> (2.1)<br><i>n</i> =14 | <b>4.5</b> (2.6)<br><i>n</i> =14 | <b>8.2</b> (2.4)<br><i>n</i> =15 | <b>6.5</b> (2.7)<br><i>n</i> =15 | <b>10.5</b> (3.8)<br><i>n</i> =15 | <b>9.3</b> (4.4)<br><i>n</i> =13 | <b>8.5</b> (3.4)<br><i>n</i> =13 |

The length of interphases (I) and mitosis (M) was measured by following nuclear envelope breakdown (NEB) and formation (NEF) by time-lapse DIC microscopy. Average times with standard deviations in brackets are indicated. The number of individual embryos scored is given. Cellularization length in wild type (Cell) corresponds to the time elapsed between NEF following the final syncytial mitosis and completion of membrane invagination. Embryos mutant for *smg* did not cellularize and the length of interphase 14 is calculated from NEF to NEB.
